# Supplementary material
Source: PubMed Central journal article supplement (PMC8640380)
Supplement: ejhpharm-2020-002204supp001.pdf [file ejhpharm-2020-002204supp001.pdf]

Supplementary Table . Drugs included in hospital formulary, commercialized drugs in the same ATC group in Spain, availability index, number of prescribed NFD and number of NFD prescriptions.

| ATC | FORMULARY DRUGS<br>(n: 942) | COMMERCIALIZED DRUGS<br>(n: 2,066) | AVAILABILITY INDEX | NFD<br>PRESCRIPTIONS<br>(n: 435) | NFD<br>(n: 140) |
|-----|-----------------------------|------------------------------------|--------------------|----------------------------------|-----------------|
| A01 | 3                           | 9                                  | 0,33               | -                                | -               |
| A02 | 9                           | 34                                 | 0,26               | 3                                | 2               |
| A03 | 8                           | 17                                 | 0,47               | 6                                | 2               |
| A04 | 5                           | 8                                  | 0,63               | -                                | -               |
| A05 | 1                           | 5                                  | 0,20               | -                                | -               |
| A06 | 16                          | 29                                 | 0,55               | 12                               | 5               |
| A07 | 13                          | 19                                 | 0,68               | 2                                | 1               |
| A08 | -                           | 2                                  | 0,00               | -                                | -               |
| A09 | 1                           | 3                                  | 0,33               | -                                | -               |
| A10 | 17                          | 57                                 | 0,30               | 6                                | 4               |
| A11 | 14                          | 21                                 | 0,67               | -                                | -               |
| A12 | 13                          | 21                                 | 0,62               | 4                                | 2               |
| A13 | -                           | 1                                  | 0,00               | -                                | -               |
| A14 | -                           | 1                                  | 0,00               | -                                | -               |
| A16 | 6                           | 19                                 | 0,32               | -                                | -               |
| B01 | 26                          | 40                                 | 0,65               | 6                                | 4               |
| B02 | 12                          | 27                                 | 0,44               | -                                | -               |
| B03 | 9                           | 27                                 | 0,33               | 7                                | 2               |
| B05 | 15                          | 15                                 | 1,00               | -                                | -               |

|     |    |    |      |    |    |
|-----|----|----|------|----|----|
| B06 | 2  | 4  | 0,50 | -  | -  |
| C01 | 24 | 33 | 0,73 | 3  | 3  |
| C02 | 12 | 14 | 0,86 | 1  | 1  |
| C03 | 8  | 19 | 0,42 | 16 | 3  |
| C04 | 2  | 8  | 0,25 | 5  | 1  |
| C05 | 5  | 19 | 0,26 | 4  | 3  |
| C07 | 9  | 26 | 0,35 | 4  | 2  |
| C08 | 6  | 14 | 0,43 | 10 | 2  |
| C09 | 7  | 59 | 0,12 | 47 | 11 |
| C10 | 8  | 36 | 0,22 | 25 | 7  |
| D01 | 5  | 18 | 0,28 | 1  | 1  |
| D02 | 1  | 1  | 1,00 | -  | -  |
| D03 | 2  | 7  | 0,29 | -  | -  |
| D04 | -  | 8  | 0,00 | -  | -  |
| D05 | 3  | 7  | 0,43 | -  | -  |
| D06 | 3  | 21 | 0,14 | -  | -  |
| D07 | 8  | 39 | 0,21 | -  | -  |
| D08 | 1  | 19 | 0,05 | -  | -  |
| D10 | -  | 13 | 0,00 | -  | -  |
| D11 | 3  | 19 | 0,16 | -  | -  |
| G01 | 2  | 10 | 0,20 | 4  | 2  |
| G02 | 7  | 15 | 0,47 | -  | -  |
| G03 | 8  | 68 | 0,12 | 3  | 2  |
| G04 | 10 | 30 | 0,33 | 71 | 9  |
| H01 | 10 | 15 | 0,67 | -  | -  |

|     |    |    |      |    |   |
|-----|----|----|------|----|---|
| H02 | 8  | 10 | 0,80 | 17 | 3 |
| H03 | 4  | 5  | 0,80 | -  | - |
| H04 | 1  | 1  | 1,00 | -  | - |
| H05 | 4  | 5  | 0,80 | -  | - |
| J01 | 57 | 93 | 0,61 | 3  | 3 |
| J02 | 10 | 10 | 1,00 | -  | - |
| J04 | 12 | 12 | 1,00 | -  | - |
| J05 | 60 | 72 | 0,83 | 1  | 1 |
| J06 | 5  | 6  | 0,83 | -  | - |
| J07 | 15 | 41 | 0,37 | -  | - |
| L02 | 14 | 16 | 0,88 | 2  | 1 |
| L03 | 10 | 17 | 0,59 | -  | - |
| L04 | 38 | 38 | 1,00 | 1  | 1 |
| M01 | 6  | 33 | 0,18 | 11 | 8 |
| M02 | 1  | 17 | 0,06 | 1  | 1 |
| M03 | 8  | 13 | 0,62 | 6  | 2 |
| M04 | 4  | 4  | 1,00 | 1  | 1 |
| M05 | 6  | 13 | 0,46 | -  | - |
| M09 | -  | 4  | 0,00 | -  | - |
| N01 | 13 | 30 | 0,43 | 2  | 1 |
| N02 | 14 | 58 | 0,24 | 6  | 3 |
| N03 | 22 | 22 | 1,00 | 8  | 3 |
| N04 | 13 | 19 | 0,68 | -  | - |
| N05 | 37 | 62 | 0,60 | 11 | 6 |
| N06 | 33 | 53 | 0,62 | 10 | 6 |

|     |    |    |      |    |    |
|-----|----|----|------|----|----|
| N07 | 18 | 24 | 0,75 | 1  | 1  |
| P01 | 13 | 13 | 1,00 | -  | -  |
| P02 | 3  | 3  | 1,00 | -  | -  |
| P03 | 1  | 1  | 1,00 | -  | -  |
| R01 | -  | 32 | 0,00 | -  | -  |
| R02 | 1  | 18 | 0,06 | -  | -  |
| R03 | 16 | 48 | 0,33 | 47 | 10 |
| R05 | 5  | 49 | 0,10 | 2  | 2  |
| R06 | 2  | 29 | 0,07 | 20 | 6  |
| R07 | -  | 4  | 0,00 | -  | -  |
| S01 | 38 | 99 | 0,38 | 43 | 10 |
| S02 | 2  | 12 | 0,17 | -  | -  |
| V01 | -  | 1  | 0,00 | -  | -  |
| V03 | 17 | 29 | 0,59 | 2  | 2  |
| V04 | 2  | 10 | 0,20 | -  | -  |
| V08 | 8  | 19 | 0,42 | -  | -  |
| V09 | -  | 30 | 0,00 | -  | -  |
| V10 | -  | 7  | 0,00 | -  | -  |
